# Supplementary material for: Is the contribution of cis and trans protonated 5-methylcytosine-SO3− isomers equal in the conversion to thymine-SO3− under bisulfite conditions? A theoretical perspective
Source: Royal Society of Chemistry journal article supplement (doi:10.1039/c4cp00387j), 2014-01-01
Supplement: c4cp00387j1.pdf [file c4cp00387j1.pdf]

Electronic Supplementary Information for:

**Is the contribution of *cis* and *trans* protonated 5-methylcytosine-SO<sub>3</sub><sup>-</sup> isomers equal to thymine-SO<sub>3</sub><sup>-</sup> under bisulfite conditions? A theoretical perspective**

Lingxia Jin<sup>a,b</sup> Lu Wang<sup>a</sup> Caiying Zhang<sup>a</sup> Wenliang Wang<sup>a,\*</sup> Suotian Min<sup>b</sup> Daodao Hu<sup>a</sup>

<sup>a</sup>*Key Laboratory for Macromolecular Science of Shaanxi Province, School of Chemistry and Chemical Engineering, Shaanxi Normal University, Xi'an 710062*

<sup>b</sup>*School of Chemical and Environmental Sciences, Shaanxi University of Technology, Hanzhong 723001*

---

\*Corresponding author: Wenliang Wang Tel: +86-29-81530815, Fax: +86-81530727  
E-mail: wliwang@snnu.edu.cn.

Table S1 Relative Energies (in  $\text{kJ}\cdot\text{mol}^{-1}$ ) for the Two Water-mediated Hydrolytic Deamination of  $\text{CytN3}^+\text{-SO}_3^-$  with the  $\text{HSO}_3^-$  Group Both in the Gas and Aqueous Phases

Table S2 Relative Energies (in  $\text{kJ}\cdot\text{mol}^{-1}$ ) for One Water-mediated Path A (1w-path A) Both in the Gas and Aqueous Phases

Table S2 Relative Energies (in  $\text{kJ}\cdot\text{mol}^{-1}$ ) for One Water-mediated Path A' (1w-path A') Both in the Gas and Aqueous Phases

Fig. S1 Optimized structures of *cis* and *trans* 5-MeCytN3<sup>+</sup>-SO<sub>3</sub><sup>-</sup> isomers in the aqueous phase are at B3LYP/6-311++G(d,p) level.

Fig. S2 Optimized structures (bond distances in Å) in the aqueous phase for the hydrolytic deamination of *cis* 5-MeCytN3<sup>+</sup>-SO<sub>3</sub><sup>-</sup> isomer with the  $\text{HSO}_3^-$  group (path A-the  $\text{HSO}_3^-$  group toward the left side of *cis* 5-MeCytN3<sup>+</sup>-SO<sub>3</sub><sup>-</sup> isomer) at the B3LYP/6-311++G(d, p) level.

Fig. S3 Optimized structures (bond distances in Å) in the aqueous phase for the hydrolytic deamination of *cis* 5-MeCytN3<sup>+</sup>-SO<sub>3</sub><sup>-</sup> isomer with the  $\text{HSO}_3^-$  group (path B-the  $\text{HSO}_3^-$  group toward the above side of *cis* 5-MeCytN3<sup>+</sup>-SO<sub>3</sub><sup>-</sup> isomer) at the B3LYP/6-311++G(d, p) level.

Fig. S4 Optimized structures (bond distances in Å) in the aqueous phase for the hydrolytic deamination of *cis* 5-MeCytN3<sup>+</sup>-SO<sub>3</sub><sup>-</sup> isomer with the  $\text{HSO}_3^-$  group (path C-the  $\text{HSO}_3^-$  group toward the right side of *cis* 5-MeCytN3<sup>+</sup>-SO<sub>3</sub><sup>-</sup> isomer) at the B3LYP/6-311++G(d, p) level.

Fig. S5 Optimized structures (bond distances in Å) in the aqueous phase for the hydrolytic deamination of *trans* 5-MeCytN3<sup>+</sup>-SO<sub>3</sub><sup>-</sup> isomer with the  $\text{HSO}_3^-$  group (path A'-the  $\text{HSO}_3^-$  group toward the left side of *trans* 5-MeCytN3<sup>+</sup>-SO<sub>3</sub><sup>-</sup> isomer) at the B3LYP/6-311++G(d, p) level.

Fig. S6 Optimized structures (bond distances in Å) in the aqueous phase for the hydrolytic deamination of *trans* 5-MeCytN3<sup>+</sup>-SO<sub>3</sub><sup>-</sup> isomer with the  $\text{HSO}_3^-$  group (path B'-the  $\text{HSO}_3^-$  group toward the above side of *trans* 5-MeCytN3<sup>+</sup>-SO<sub>3</sub><sup>-</sup> isomer) at the B3LYP/6-311++G(d, p) level.

Fig. S7 Optimized structures (bond distances in Å) in the aqueous phase for the hydrolytic deamination of *trans* 5-MeCytN3<sup>+</sup>-SO<sub>3</sub><sup>-</sup> isomer with the  $\text{HSO}_3^-$  group (path C'-the  $\text{HSO}_3^-$  group toward the right side of *trans* 5-MeCytN3<sup>+</sup>-SO<sub>3</sub><sup>-</sup> isomer) at the B3LYP/6-311++G(d, p) level.

Fig. S8 Optimized stationary structures (bond distances in Å) in the aqueous phase for two water-

mediated path A (2w-path A) are at B3LYP/6-311++G(d,p) level.

Fig. S9 Optimized stationary structures (bond distances in Å) in the aqueous phase for two water-mediated path A' (2w-path A') are at B3LYP/6-311++G(d,p) level.

Table S1 Relative Energies <sup>a</sup> (in kJ·mol<sup>-1</sup>) for the Two Water-mediated Hydrolytic Deamination of CytN3<sup>+</sup>-SO<sub>3</sub><sup>-</sup> with the HSO<sub>3</sub><sup>-</sup> Group Both in the Gas and Aqueous Phases

| System                            | MP2//B3LYP <sup>b</sup> |              |                        | PCM <sup>c</sup> |                          |
|-----------------------------------|-------------------------|--------------|------------------------|------------------|--------------------------|
|                                   | $\Delta E^g$            | $\Delta G^g$ | $\Delta G^{g\ddagger}$ | $\Delta G^{s-a}$ | $\Delta G^{s-a\ddagger}$ |
| 2w-path A                         |                         |              |                        |                  |                          |
| R <sup>d</sup> +2H <sub>2</sub> O | 0.00                    | 0.00         |                        | 0.00             |                          |
| 2w-A-RC                           | -354.24                 | -192.44      |                        | 35.03            |                          |
| 2w-A-TS1                          | -263.53                 | -94.08       |                        | 120.30           |                          |
| 2w-A-IM1                          | -265.49                 | -101.21      |                        | 102.75           |                          |
| 2w-A-TS2                          | -193.38                 | -25.03       |                        | 190.93           |                          |
| 2w-A-IM2                          | -322.09                 | -155.50      |                        | 60.41            |                          |
| 2w-A-TS3                          | -334.34                 | -163.09      |                        | 106.18           |                          |
| 2w-A-P                            | -376.69                 | -218.57      |                        | 59.82            |                          |
| 2w-A-RC→2w-A-IM1                  |                         |              | 98.36                  |                  | 85.27                    |
| 2w-A-IM1→2w-A-IM2                 |                         |              | 76.18                  |                  | 88.18                    |
| 2w-A-IM1→2w-A-P                   |                         |              | -7.59                  |                  | 45.77                    |

<sup>a</sup>  $\Delta G^g$ ,  $\Delta E^g$ , and  $\Delta G^{g\ddagger}$  are relative free energy, relative energy, and activation free energy in the gas phase, respectively.  $\Delta G^{s-a}$  and  $\Delta G^{s-a\ddagger}$  are relative free energy and activation free energy with PCM model based on the optimized geometries in the aqueous phase, respectively.

<sup>b</sup> MP2/6-311++G(3df,3pd)//B3LYP/6-311++G(d,p) level. <sup>c</sup> MP2/6-311++G(3df,3pd)//B3LYP/6-311++G(d,p) with PCM model. <sup>d</sup> denotes CytN3<sup>+</sup>-SO<sub>3</sub><sup>-</sup> +H<sub>2</sub>O+HSO<sub>3</sub><sup>-</sup>.

Table S2 Relative Energies <sup>a</sup> (in kJ·mol<sup>-1</sup>) for One Water-mediated Path A (1w-path A) Both in the Gas and Aqueous Phases

| System                           | MP2//B3LYP <sup>b</sup> |              |                        | PCM <sup>c</sup> |                          |
|----------------------------------|-------------------------|--------------|------------------------|------------------|--------------------------|
|                                  | $\Delta E^g$            | $\Delta G^g$ | $\Delta G^{g\ddagger}$ | $\Delta G^{s-a}$ | $\Delta G^{s-a\ddagger}$ |
| 1w-path A                        |                         |              |                        |                  |                          |
| R <sup>d</sup> +H <sub>2</sub> O | 0.00                    | 0.00         |                        | 0.00             | 0.00                     |
| 1w-A-RC                          | -219.84                 | -203.55      |                        | -112.38          | 6.35                     |
| 1w-A-TS1                         | -273.20                 | -86.97       |                        | -33.94           | 98.02                    |
| 1w-A-IM1                         | -252.75                 | -144.06      |                        | -67.80           | 61.65                    |
| 1w-A-TS2                         | -273.34                 | -120.17      |                        | -60.44           | 73.26                    |
| 1w-A-IM2                         | -280.36                 | -145.28      |                        | -83.52           | 45.82                    |
| 1w-A-TS3                         | -275.23                 | -150.61      |                        | -81.73           | 48.65                    |
| 1w-A-IM3                         | -274.50                 | -147.54      |                        | -74.19           | 54.25                    |
| 1w-A-TS4                         | -286.76                 | -145.54      |                        | -72.23           | 58.34                    |
| 1w-A-IM4                         | -255.98                 | -154.06      |                        | -116.18          | 16.71                    |
| 1w-A-TS5                         | -284.74                 | -119.72      |                        | -64.07           | 74.62                    |
| 1w-A-IM5                         | -289.85                 | -153.08      |                        | -92.06           | 41.02                    |
| 1w-A-TS6                         | -283.89                 | -155.69      |                        | -101.78          | 31.37                    |
| 1w-A-IM6                         | -256.16                 | -151.06      |                        | -101.87          | 30.36                    |
| 1w-A-TS7                         | -348.36                 | -123.07      |                        | -72.65           | 59.57                    |
| 1w-A-P                           | -322.97                 | -224.89      |                        |                  |                          |
| 1w-A-RC→1w-A-IM1                 |                         |              | 116.58                 |                  | 91.67                    |
| 1w-A-IM1→1w-A-IM2                |                         |              | 23.89                  |                  | 11.61                    |
| 1w-A-IM2→1w-A-IM3                |                         |              | -5.33                  |                  | 2.83                     |
| 1w-A-IM3→1w-A-IM4                |                         |              | 2.00                   |                  | 4.09                     |
| 1w-A-IM4→1w-A-IM5                |                         |              | 34.34                  |                  | 57.91                    |
| 1w-A-IM5→1w-A-IM6                |                         |              | -2.61                  |                  | -9.65                    |
| 1w-A-IM6→1w-A-P                  |                         |              | 27.99                  |                  | 29.21                    |

<sup>a</sup>  $\Delta G^g$ ,  $\Delta E^g$ , and  $\Delta G^{g\ddagger}$  are relative free energy, relative energy, and activation free energy in the gas phase, respectively.  $\Delta G^{s-a}$  and  $\Delta G^{s-a\ddagger}$  are relative free energy and activation free energy with PCM model based on the optimized geometries in the aqueous phase, respectively.

<sup>b</sup> MP2/6-311++G(3df,3pd)//B3LYP/ 6-311++G(d,p) level. <sup>c</sup> MP2/6-311++G(3df,3pd)//B3LYP/6-311++G(d,p) with PCM model. <sup>d</sup>

denotes *cis* 5-MeCytN3<sup>+</sup>-SO<sub>3</sub><sup>-</sup> isomer +H<sub>2</sub>O+HSO<sub>3</sub><sup>-</sup>.

Table S3 Relative Energies <sup>a</sup> (in kJ·mol<sup>-1</sup>) for One Water-mediated Path A' (1w-path A') Both in the Gas and Aqueous Phases

| System                           | MP2//B3LYP <sup>b</sup> |              |                        | PCM <sup>c</sup> |                          |
|----------------------------------|-------------------------|--------------|------------------------|------------------|--------------------------|
|                                  | $\Delta E^g$            | $\Delta G^g$ | $\Delta G^{g\ddagger}$ | $\Delta G^{s-a}$ | $\Delta G^{s-a\ddagger}$ |
| 1w-path A'                       |                         |              |                        |                  |                          |
| R <sup>d</sup> +H <sub>2</sub> O | 0.00                    | 0.00         |                        | 0.00             |                          |
| 1w-A'-RC                         | -312.25                 | -195.26      |                        | -1.40            |                          |
| 1w-A'-TS1                        | -218.69                 | -84.70       |                        | 107.56           |                          |
| 1w-A'-IM1                        | -276.65                 | -145.48      |                        | 66.70            |                          |
| 1w-A'-TS2                        | -256.93                 | -122.31      |                        | 75.31            |                          |
| 1w-A'-IM2                        | -277.22                 | -146.37      |                        | 54.26            |                          |
| 1w-A'-TS3                        | -284.23                 | -151.97      |                        | 56.75            |                          |
| 1w-A'-IM3                        | -279.04                 | -149.14      |                        | 59.95            |                          |
| 1w-A'-TS4                        | -280.65                 | -149.00      |                        | 34.35            |                          |
| 1w-A'-IM4                        | -290.38                 | -155.58      |                        | 47.57            |                          |
| 1w-A'-TS5                        | -260.05                 | -122.42      |                        | 77.10            |                          |
| 1w-A'-IM5                        | -287.49                 | -153.27      |                        | 47.02            |                          |
| 1w-A'-TS6                        | -292.48                 | -156.21      |                        | 11.61            |                          |
| 1w-A'-IM6                        | -286.22                 | -151.22      |                        | 35.43            |                          |
| 1w-A'-TS7                        | -244.57                 | -110.52      |                        | 100.24           |                          |
| 1w-A'-P                          | -352.41                 | -227.43      |                        | -25.25           |                          |
| 1w-A'-RC→1w-A'-IM1               |                         |              | 110.56                 |                  | 108.96                   |
| 1w-A'-IM1→1w-A'-IM2              |                         |              | 23.17                  |                  | 8.61                     |
| 1w-A'-IM2→1w-A'-IM3              |                         |              | -5.60                  |                  | 2.49                     |
| 1w-A'-IM3→1w-A'-IM4              |                         |              | 0.14                   |                  | -25.60                   |
| 1w-A'-IM4→1w-A'-IM5              |                         |              | 33.16                  |                  | 29.53                    |
| 1w-A'-IM5→1w-A'-IM6              |                         |              | -2.94                  |                  | -35.41                   |
| 1w-A'-IM6→1w-A'-P                |                         |              | 40.70                  |                  | 64.81                    |

<sup>a</sup>  $\Delta G^g$ ,  $\Delta E^g$ , and  $\Delta G^{g\ddagger}$  are relative free energy, relative energy, and activation free energy in the gas phase, respectively.  $\Delta G^{s-a}$  and  $\Delta G^{s-a\ddagger}$  are relative free energy and activation free energy with PCM model based on the optimized geometries in the aqueous phase, respectively.

<sup>b</sup> MP2/6-311++G(3df,3pd)//B3LYP/ 6-311++G(d,p) level. <sup>c</sup> MP2/6-311++G(3df,3pd)//B3LYP/6-311++G(d,p) with PCM model. <sup>d</sup>

denotes *trans* 5-MeCytN3<sup>+</sup>-SO<sub>3</sub><sup>-</sup> isomer +H<sub>2</sub>O+HSO<sub>3</sub><sup>-</sup>.

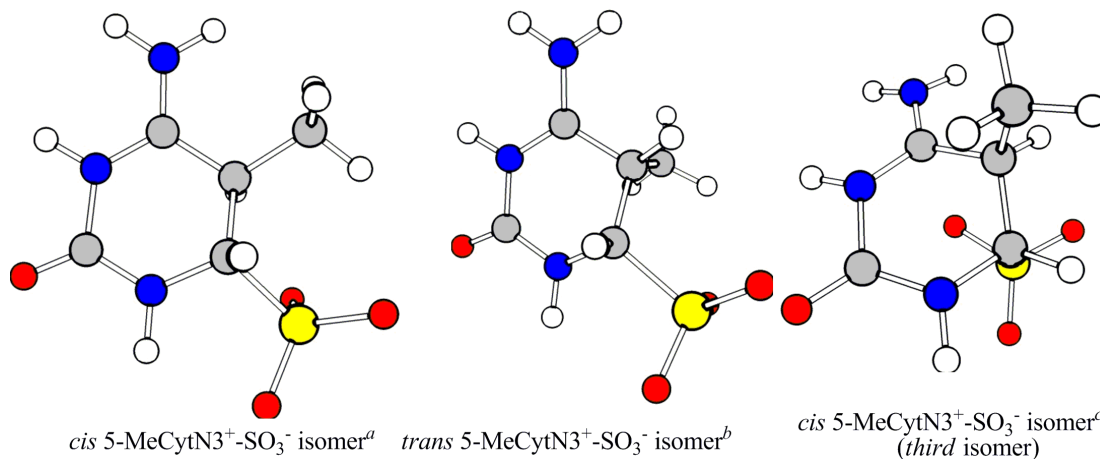

Fig. S1

<sup>a</sup> 5-H *cis* to 6-SO<sub>3</sub><sup>-</sup> (both the CH<sub>3</sub> and SO<sub>3</sub> occupy equatorial positions); <sup>b</sup> 5-H *trans* to 6-SO<sub>3</sub><sup>-</sup> (the CH<sub>3</sub> occupies axial position and the SO<sub>3</sub> occupies equatorial position); <sup>c</sup> 5-H *cis* to 6-SO<sub>3</sub><sup>-</sup> (both the CH<sub>3</sub> and SO<sub>3</sub> occupy axial positions).

We have designed various initial deamination routes of *third* 5-MeCytN3<sup>+</sup>-SO<sub>3</sub><sup>-</sup> isomer for optimization, but the hydrolytic product of each step is always similar to that of *cis* 5-MeCytN3<sup>+</sup>-SO<sub>3</sub><sup>-</sup> isomer, which may result from the low free energy barrier of the conversion between *third* and *cis* 5-MeCytN3<sup>+</sup>-SO<sub>3</sub><sup>-</sup> isomers.<sup>1</sup> Thus, our interest has been focused on the hydrolytic deamination routes of *cis* and *trans* 5-MeCytN3<sup>+</sup>-SO<sub>3</sub><sup>-</sup> isomers in this study.

(1) L. X. Jin, W. L. Wang, D. D. Hu and S. T. Min, *J. Phys. Chem. B.*, 2013, **117**, 3.

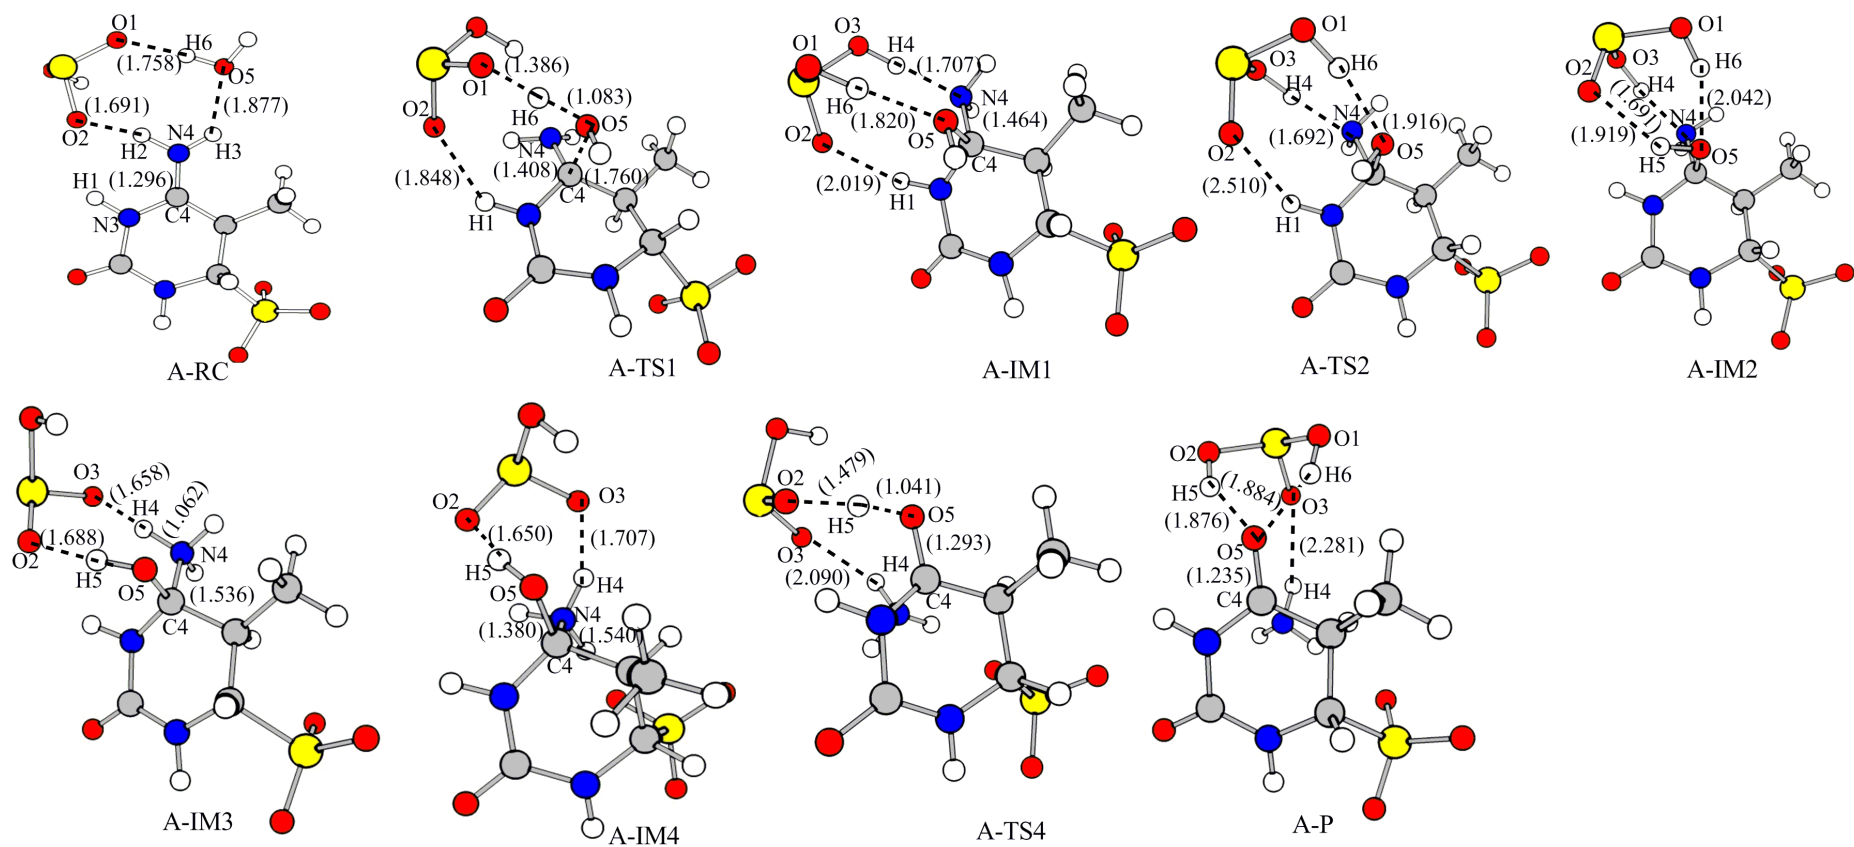

Fig. S2



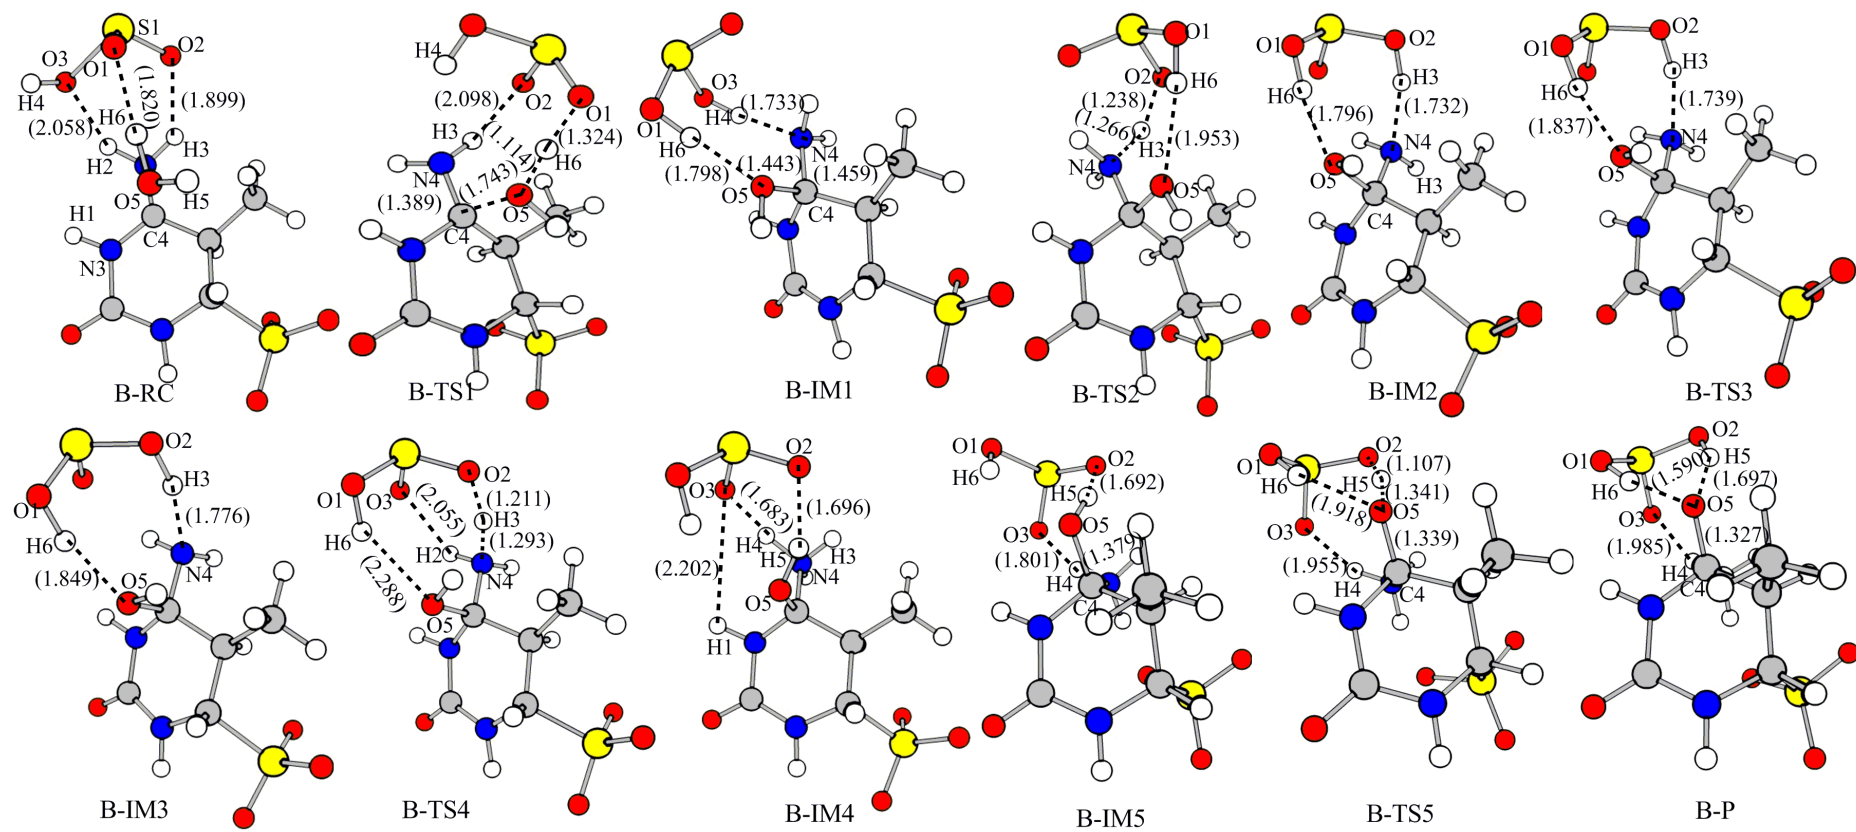

Fig. S3

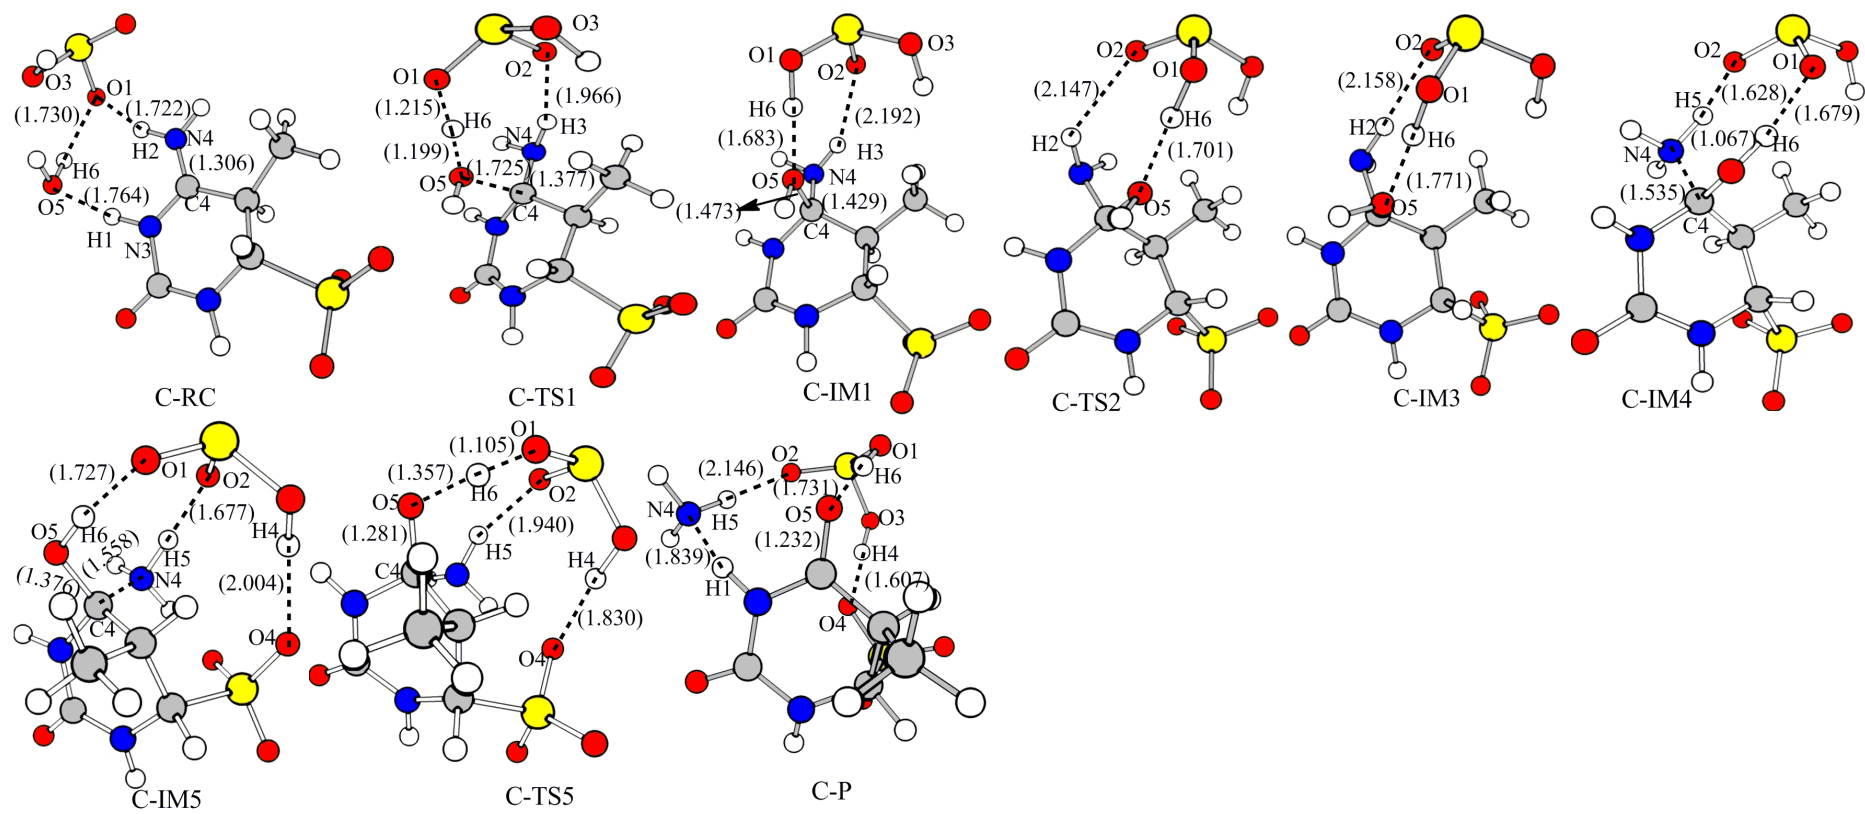

Fig. S4

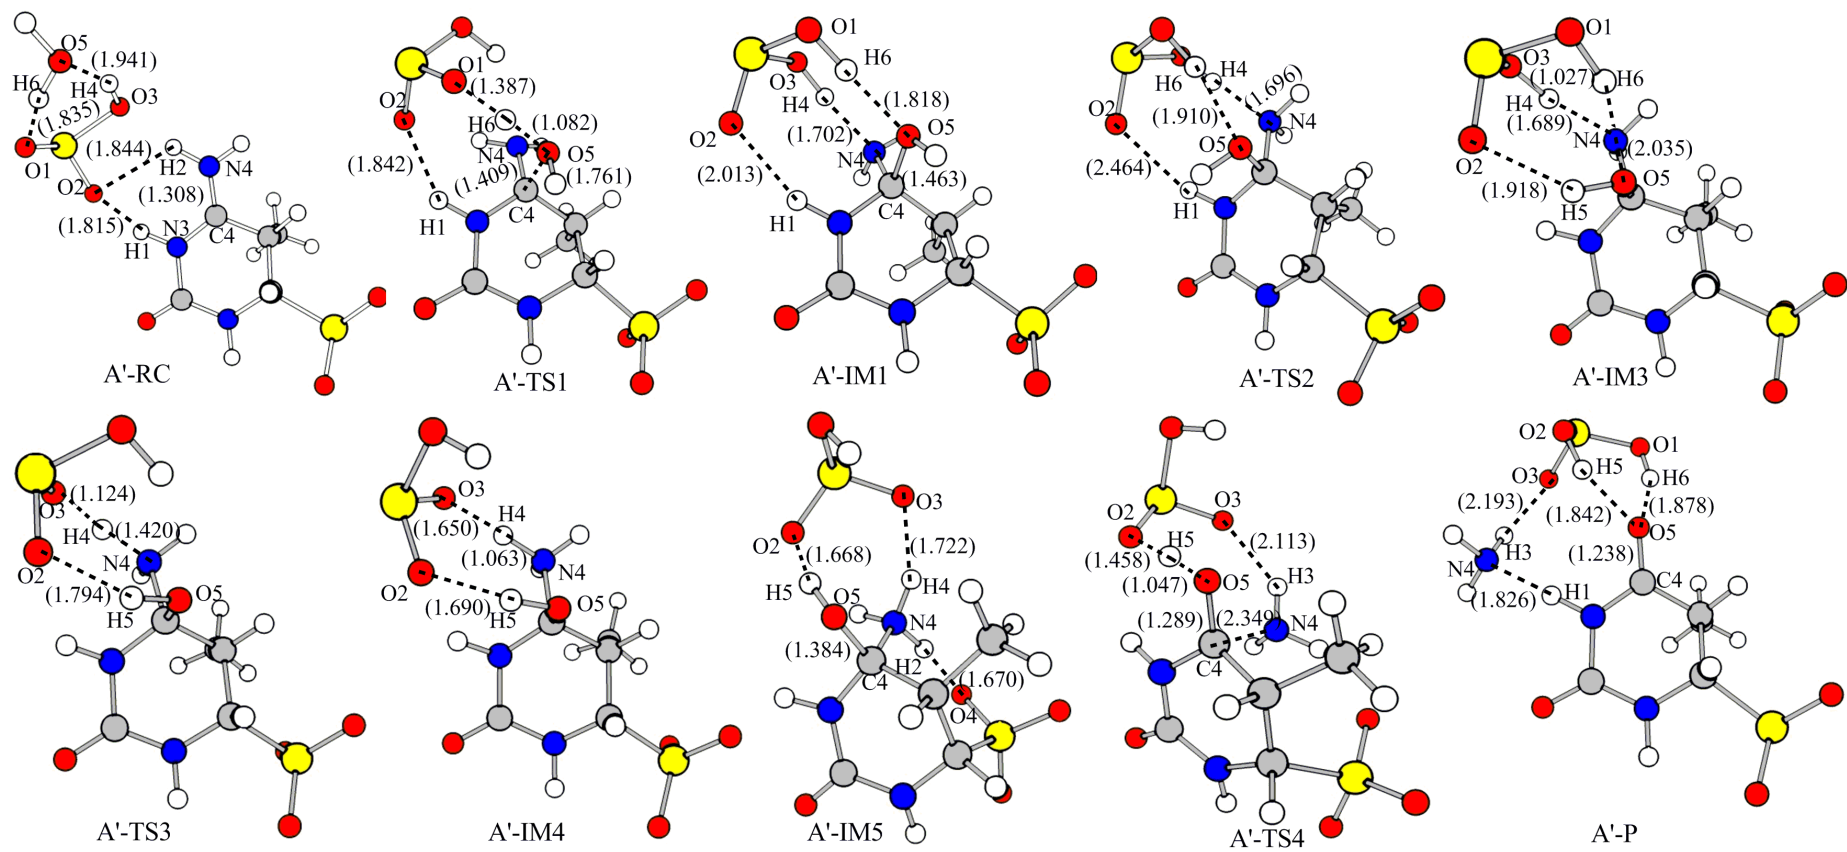

Fig. S5

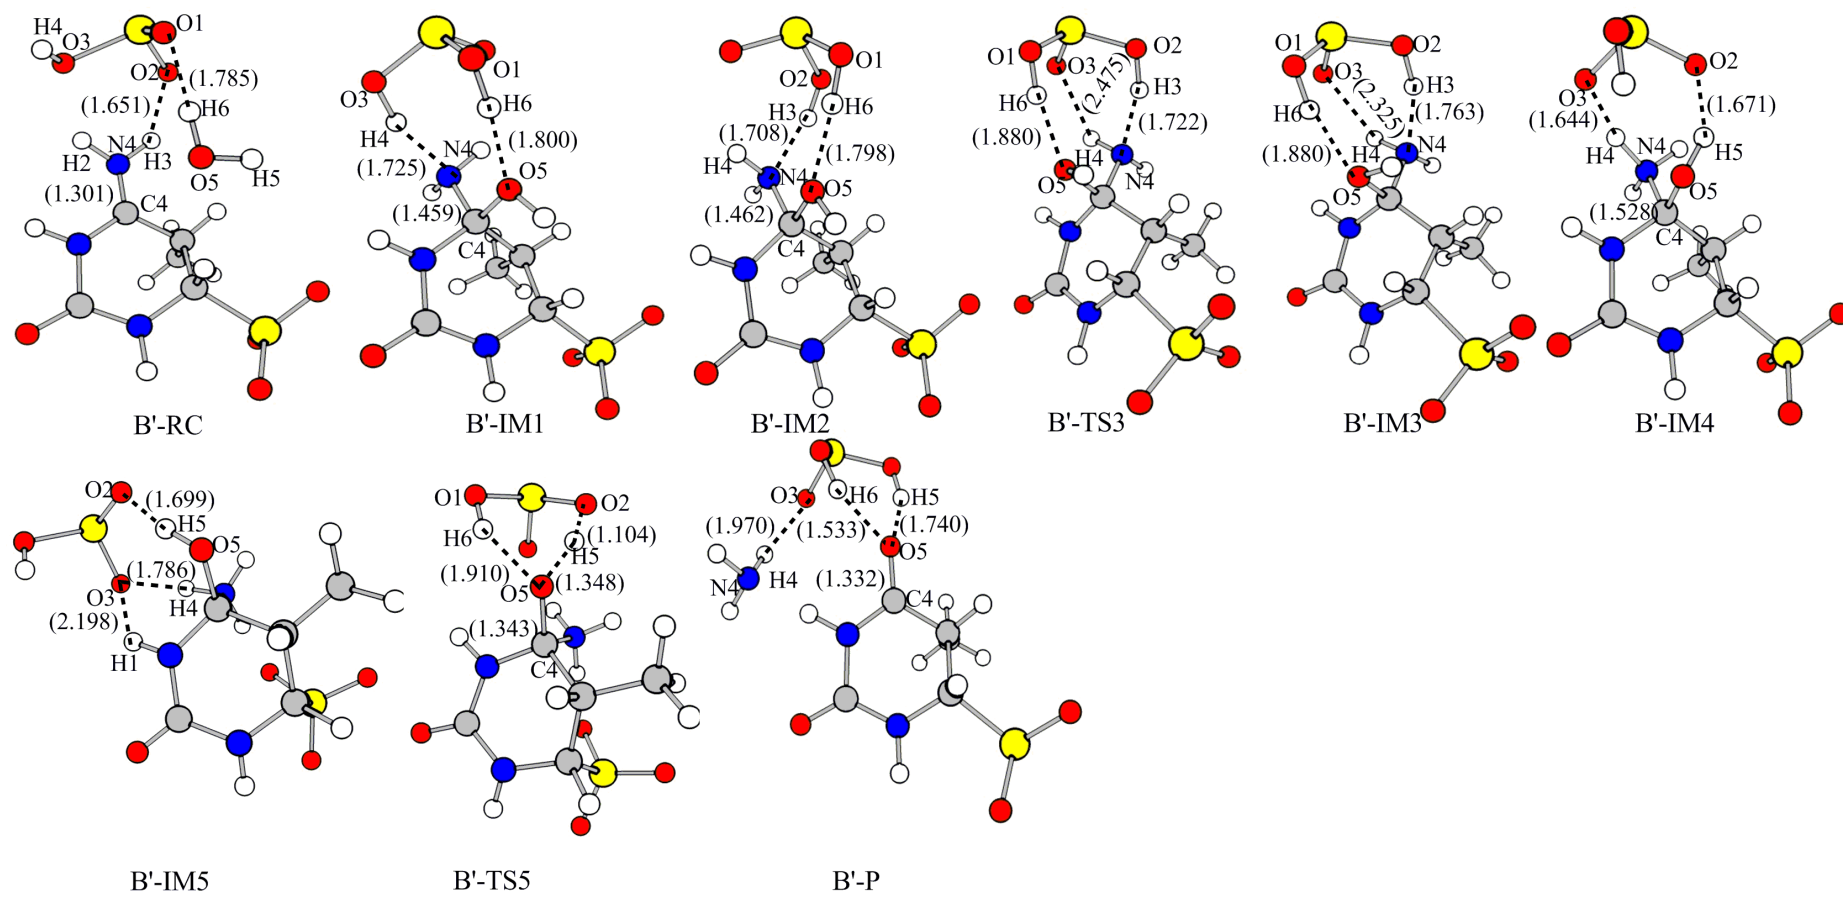

Fig. S6

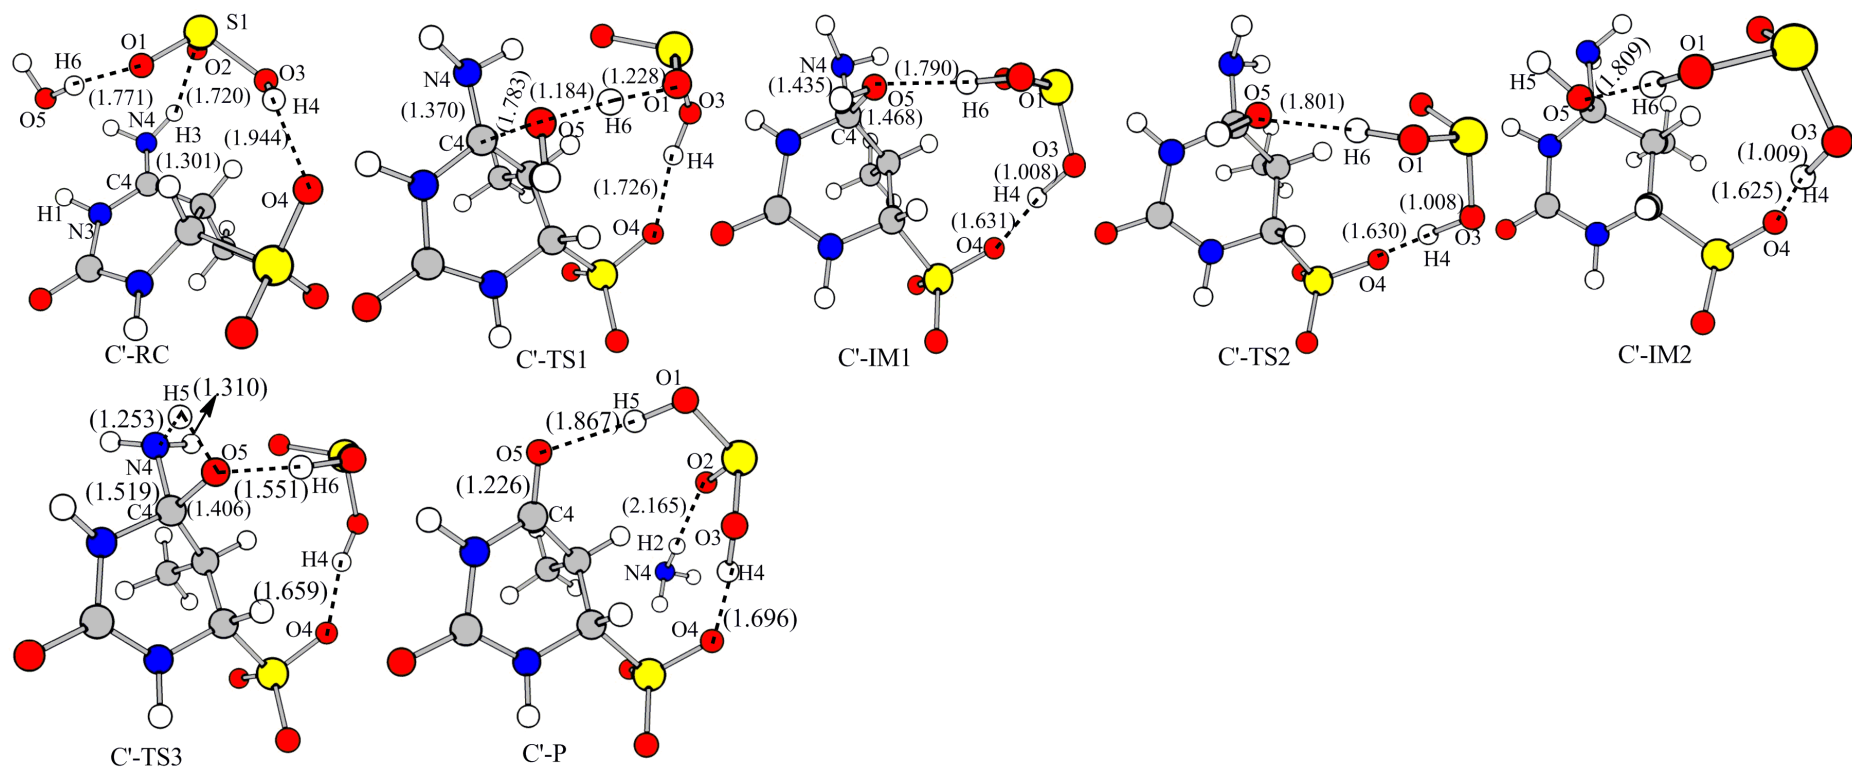

Fig. S7

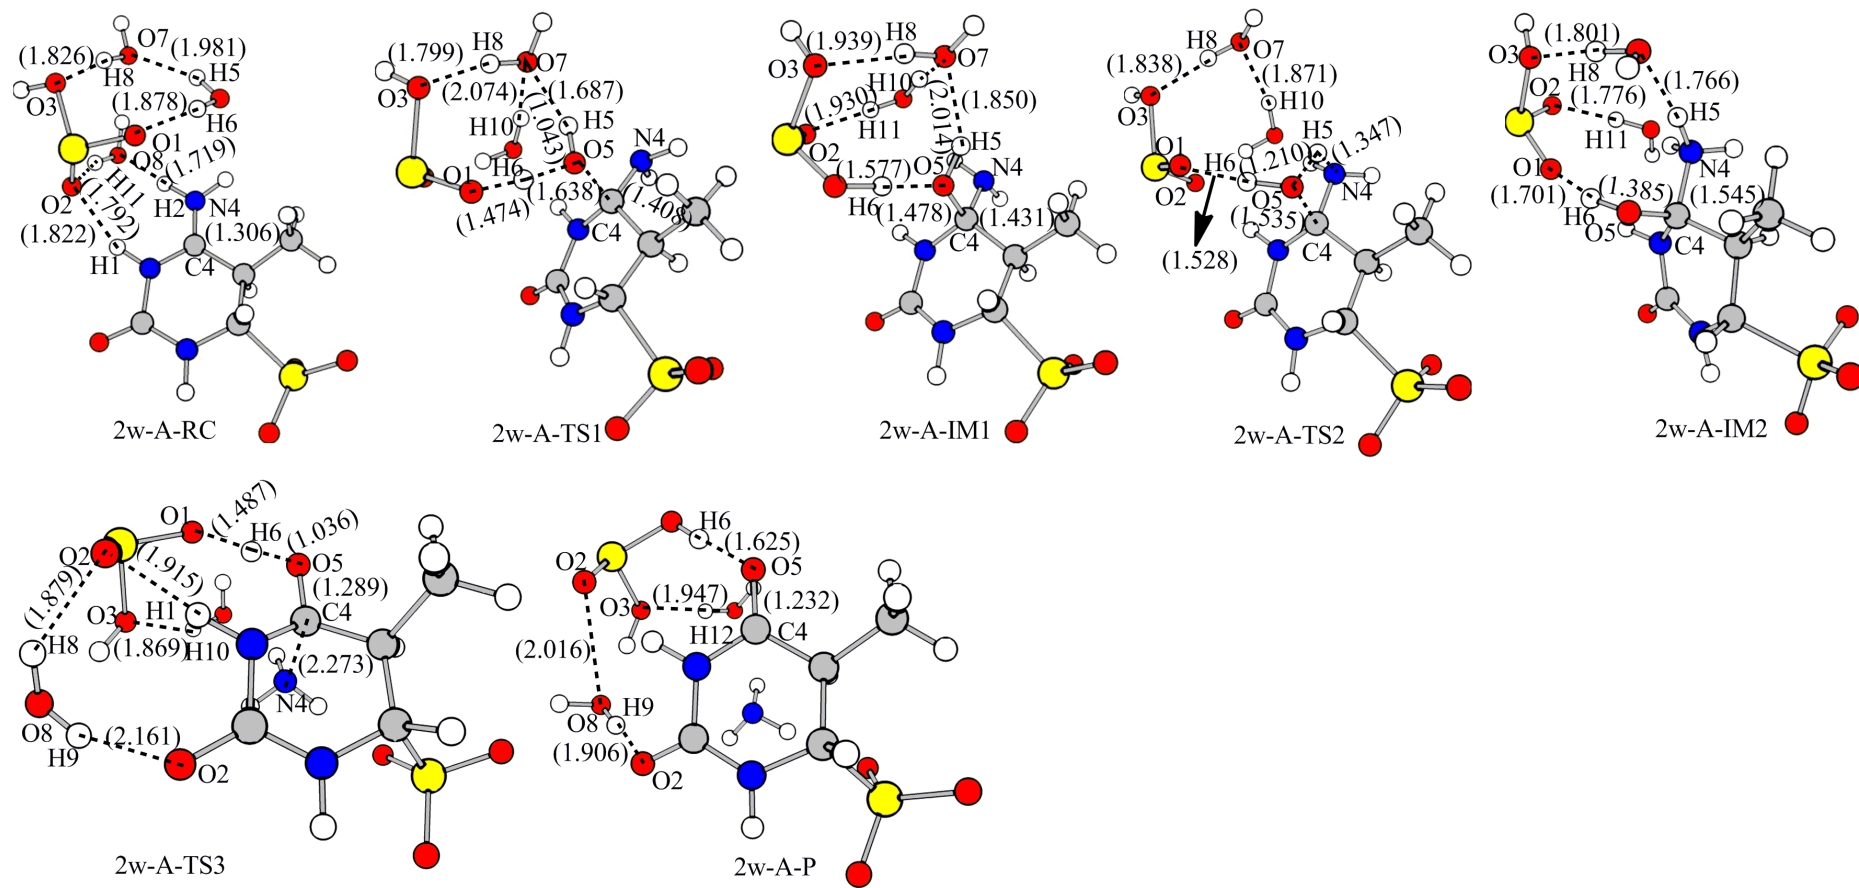

Fig. S8



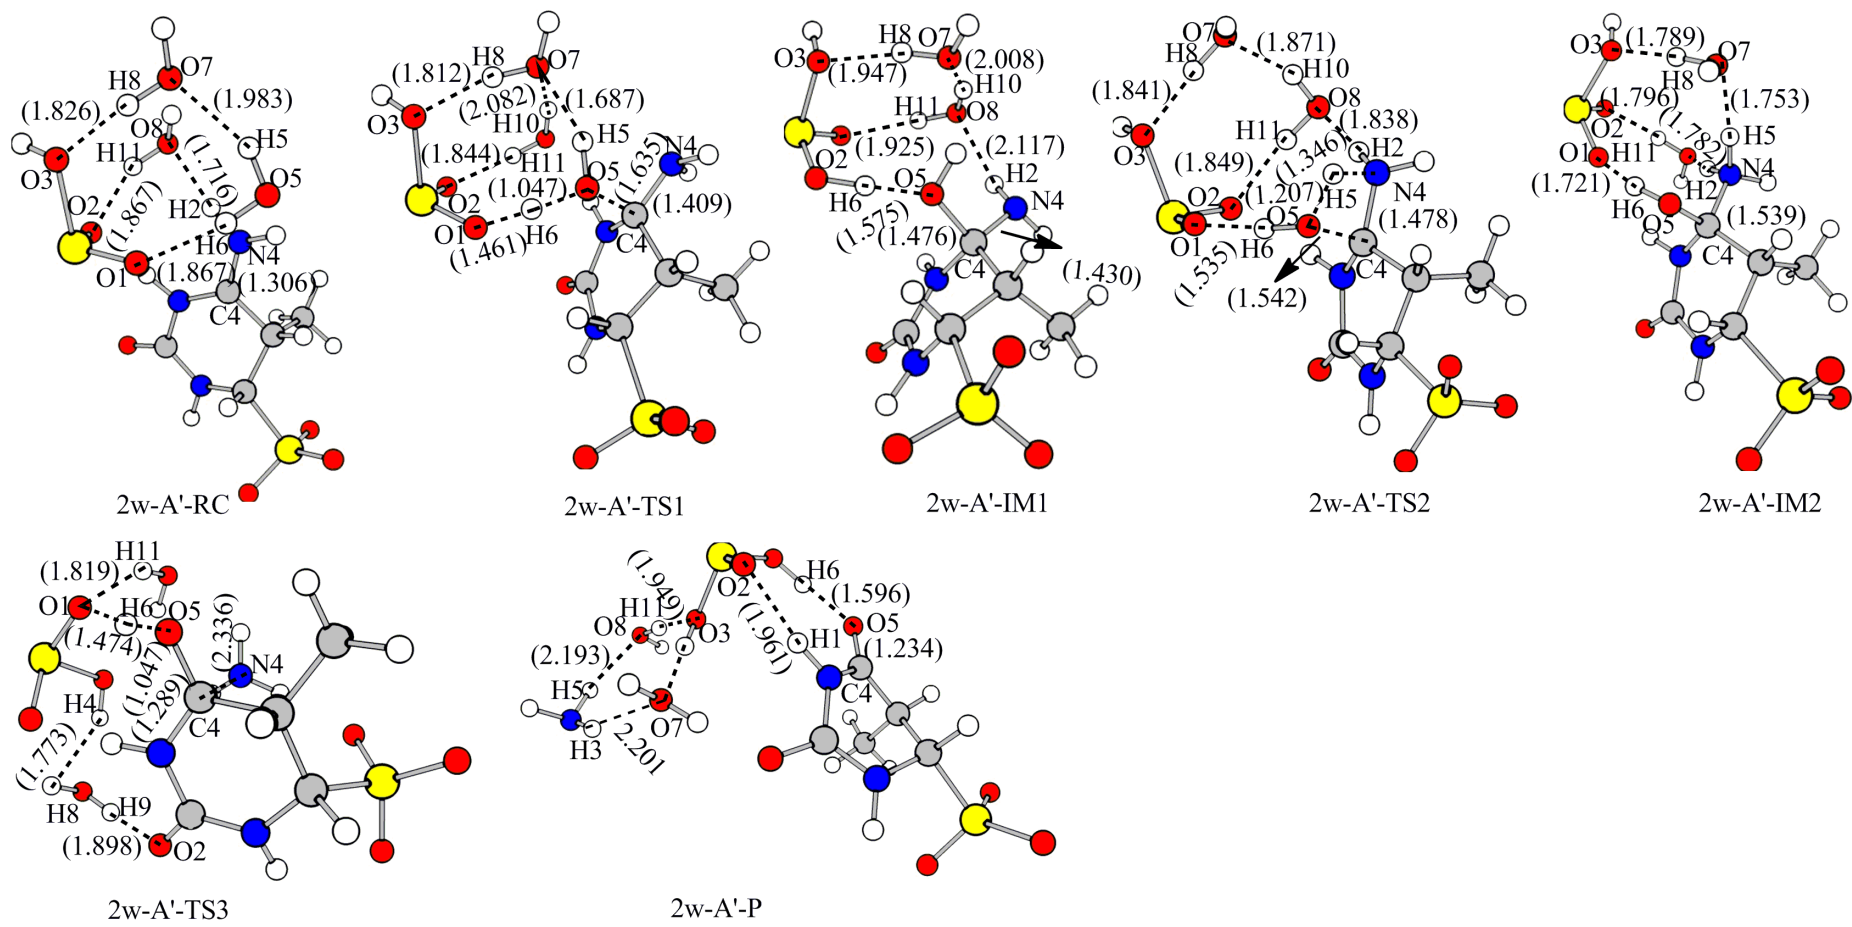

Fig. S9
